# Supplementary material for: NMR studies of short and intermediate range ordering of amorphous Si–B–N–C–H pre-ceramic at the pyrolysis stage of 600 °C
Source: Royal Society of Chemistry journal article supplement (doi:10.1039/b707446h), 2007-01-01
Supplement: b707446h.pdf [file b707446h.pdf]

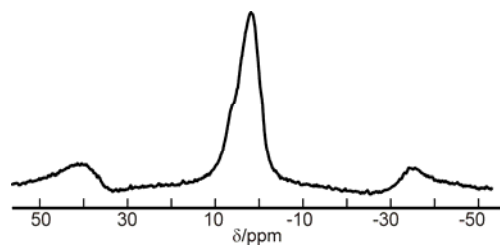

**Fig.1.**  $^1\text{H}$  spectrum of pre-ceramic  $\text{SiBN}_3\text{C}$  at 600 °C,  
 $\omega_r / (2\pi) = 14$  kHz.

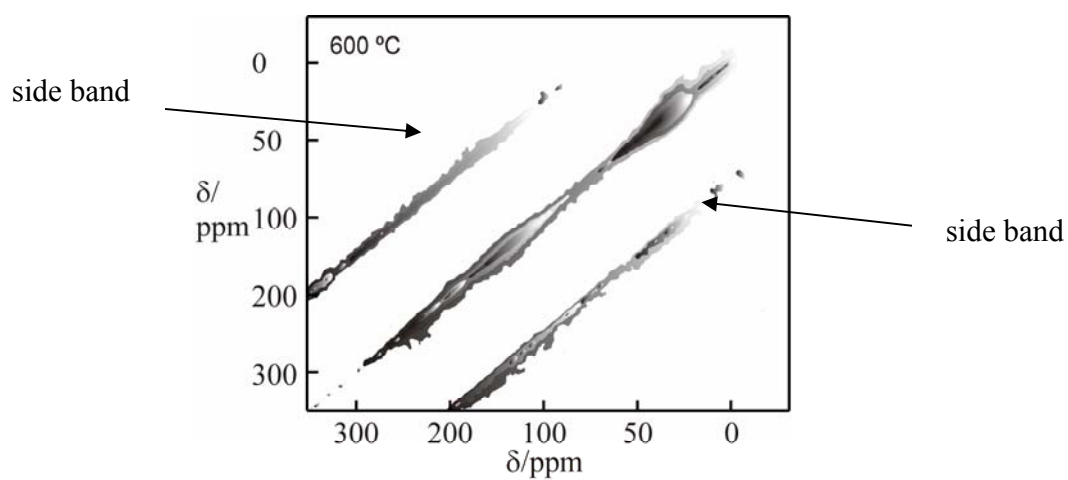

**Fig.2.**  $^{13}\text{C}$ -RFDR spectrum at 600 °C

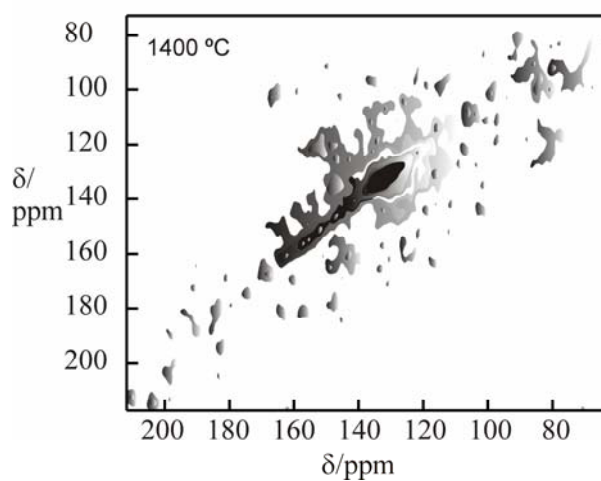

**Fig.3.**  $^{13}\text{C}$ -RFDR spectrum at 1400 °C
